# Supplementary material for: Assessment of treatment efficacy using surface-enhanced Raman spectroscopy analysis of urine in rats with kidney transplantation or kidney disease
Source: Springer Nature journal article supplement (doi:10.1007/s10157-019-01721-w), 2019-03-04
Supplement: MOESM1 [file 16523990]

Supplementary Table 1 The demographic Information of donors

|  | Healthy control (n = 10) | Kidney IRI (n = 10) | *P* value (t-test) |
| --- | --- | --- | --- |
| Age (yr) | 50.2 ± 11.49 | 38.9 ± 10.45 | 0.0086 |
| Gender (F/M) | 5/5 | 5/5 |  |
| Urine protein (g/L) | 0.147 ± 0.057 | 0.73 ± 0.811 | 0.0242 |
| Urinary Alb/Cre (g/mol) | 14.182 ± 7.925 | 140.438 ± 196.607 | 0.0368 |

IRI: ischemia reperfusion injury. Alb/Cre: albumin to creatinine ratio.

The urine samples were collected and examined under approved protocol (H07-03043) by the Clinical Research Ethics Board at the University of British Columbia (Canada) and the Ethics Committee of West China Hospital of Sichuan University (China).
